# Supplementary material for: Enhancing the energy conversion efficiency of low mobility solar cells by a 3D device architecture
Source: Royal Society of Chemistry journal article supplement (doi:10.1039/c9tc02358e), 2019-01-01
Supplement: c9tc02358e1.pdf [file c9tc02358e1.pdf]

## Supplementary Information

# Enhancing the energy conversion efficiency of low mobility solar cells by a 3D device architecture

Wayesh Qarony<sup>1,†</sup>, Mohammad I. Hossain<sup>1,†</sup>, Asman Tamang<sup>2</sup>, Vladislav Jovanov<sup>2</sup>,  
Alberto Salleo<sup>3</sup>, Dietmar Knipp<sup>\*2,3</sup>, Yuen Hong Tsang<sup>\*1</sup>

1.) Department of Applied Physics, The Hong Kong Polytechnic University, Hung  
Hom, Kowloon, Hong Kong

2.) Research Center for Functional Materials and Nanomolecular Science, Jacobs  
University Bremen, 28759 Bremen, Germany

3.) Geballe Laboratory for Advanced Materials, Department of Materials Science and  
Engineering, Stanford University, Stanford, CA 94305, USA

†: W. Q. and M.I.H. are equally contributed to this work

\*Corresponding authors: yuen.tsang@polyu.edu.hk (Y.H. Tsang)

dknipp@stanford.edu (D. Knipp)

## Supplementary Information

Fig S1(a-e) exhibits the schematic cross sections of solar cells with constant period,  $p$ , and height,  $h$ , but varying pyramid base,  $b_p$ . The period and height of the pyramid was kept constant at 600 nm and 600 nm. The base period of the pyramid was varied from 600 nm to 300 nm. The corresponding quantum efficiency and short circuit current is shown in Fig. S1(f) and S1(g). The short circuit current density increases with increasing  $h/b_p$  ratio. The optical simulations show for example, that the short circuit current of a solar cell using a base period of 600 nm and a height of 1200 nm is equal to the short circuit current of a solar cell using a base period of 300 nm and a height of 600 nm, which confirms that an equal  $h/b_p$  ratio leads to equal short circuit current densities.

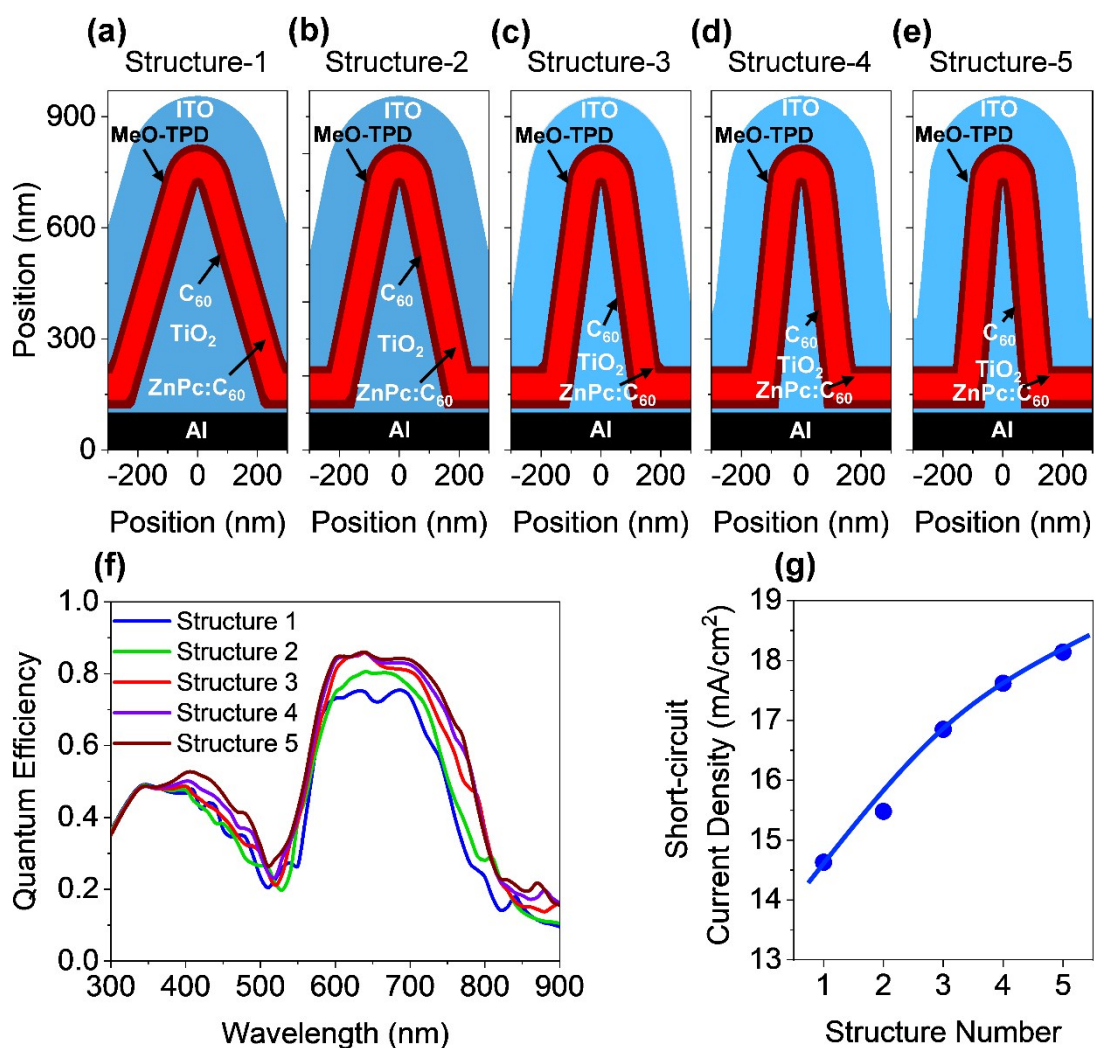

## Supplementary Information

**Fig. S1.** (a-e) Cross sections, (f) a comparison of calculated quantum efficiency, and (g) a comparison of short-circuit current density of 3D or folded solar cells for different pyramid texture profile dimensions. The pyramid texture height is kept constant at 600 nm.

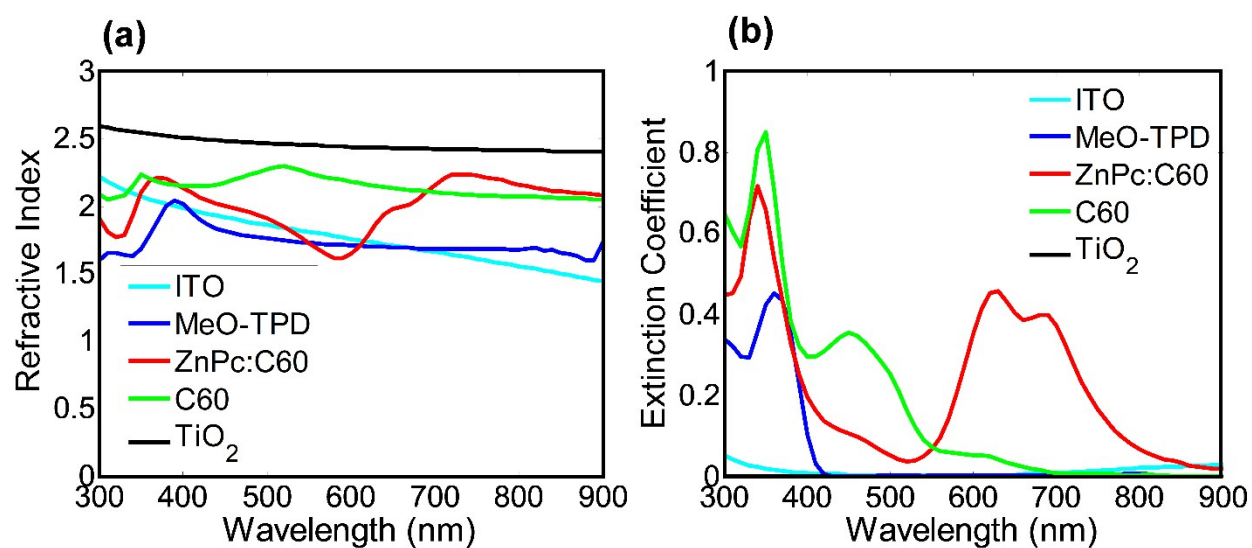

**Fig. S2.** (a) Refractive index and (b) extinction coefficient of organic/inorganic materials used for the realization of small molecule planar and 3D or folded organic solar cells. Data are adapted from Ref. [35, 39-41].
